1 **Title:** Ribosomal RNA methylation by GidB is a capacitor for discrimination of mischarged tRNA

2

3 **Authors:** Zhuo Bi<sup>1,2</sup>, Hong-Wei Su<sup>1</sup>, Jia-Yao Hong<sup>1</sup> and Babak Javid<sup>1,3\*</sup>

4

5 **Affiliations:**

6 <sup>1</sup> Center for Global Health and Infectious Disease, Tsinghua University School of Medicine, Beijing,

7 China

8 <sup>2</sup> School of Life Science, Tsinghua University, Beijing, China

9 <sup>3</sup> Division of Experimental Medicine, University of California, San Francisco, CA, USA

10

11 \* to whom correspondence should be addressed: [babak.javid@ucsf.edu](mailto:babak.javid@ucsf.edu)

12

13 **Summary**

14 Despite redundant cellular pathways to minimize translational errors, errors in protein synthesis are  
15 common. Pathways and mechanisms to minimize errors are classified as pre-ribosomal or ribosomal.  
16 Pre-ribosomal pathways are primarily concerned with appropriate pairing of tRNAs with their cognate  
17 amino acid, whereas to date, ribosomal proof-reading has been thought to only be concerned with  
18 minimizing decoding errors, since it has been assumed that the ribosomal decoding centre is blind to  
19 mischarged tRNAs. Here, we identified that in mycobacteria, deletion of the 16S ribosomal RNA  
20 methyltransferase *gidB* led to increased discrimination of mischarged tRNAs. *GidB* deletion was  
21 necessary but not sufficient for reducing mistranslation due to misacylation. Discrimination only  
22 occurred in mycobacteria enriched from environments or genetic backgrounds with high rates of  
23 mistranslation. Our data suggest that mycobacterial ribosomes are capable of discriminating mischarged  
24 tRNAs and that 16S rRNA methylation by *GidB* may act as a capacitor for moderating translational  
25 error.

26

## 27 **Introduction**

28 All cells in all clades of life have evolved multiple, redundant pathways to reduce translational error  
29 (Mohler and Ibba, 2017; Zaher and Green, 2009a). Yet errors in protein synthesis are remarkably  
30 common and are orders of magnitude more frequent than errors in DNA or RNA synthesis (Drummond  
31 and Wilke, 2009; Fan et al., 2017; Ling et al., 2015; Ribas de Pouplana et al., 2014; Schwartz and Pan,  
32 2017). There is no one ‘optimal’ rate of error. Tolerable error rates are both species and even organelle  
33 specific (Mohler and Ibba, 2017; Reynolds et al., 2010), and the major source of errors vary by  
34 mechanism and species (Mohler and Ibba, 2017). Furthermore, translational errors, mistranslation, may  
35 result in adaptive phenotypes, particularly in the context of environmental stressors (Chaudhuri et al.,  
36 2018; Evans et al., 2018; Fan et al., 2015; Javid et al., 2014; Lee et al., 2014; Li et al., 2011; Miranda  
37 et al., 2013; Mohler and Ibba, 2017; Netzer et al., 2009; Rathnayake et al., 2017; Ribas de Pouplana et  
38 al., 2014; Schwartz and Pan, 2016, 2017; Schwartz et al., 2016; Su et al., 2016). However, excess  
39 mistranslation can also cause protein aggregation (Ling et al., 2012; Zhang et al., 2019), organ  
40 degeneration (Lee et al., 2006; Liu et al., 2014) and is the mechanism for the bactericidal activity of  
41 aminoglycosides (Kohanski et al., 2008), suggesting that an optimal balance for translational error does  
42 exist, but one that is tunable and context specific (Fan et al., 2019; Ling et al., 2015; Mohler and Ibba,  
43 2017; Schwartz and Pan, 2017).

44

45 In addition, molecular mechanisms of translational error whether physiological or undesirable vary  
46 considerably, as do the proof-reading pathways that have evolved to reduce them. Generally, sources  
47 of error and proof-reading can be divided into pre-ribosomal and ribosomal mechanisms (Mohler and  
48 Ibba, 2017). Pre-ribosomal proof-reading mechanisms include pre- and post-transfer editing functions  
49 of aminoacyl tRNA synthetases (Rubio Gomez and Ibba, 2020). Following aminoacyl-tRNA synthesis,  
50 *trans*-acting editing mechanisms can reject mischarged tRNAs (Chong et al., 2008; Vargas-Rodriguez  
51 and Musier-Forsyth, 2013), and the aminoacyl-tRNA chaperone, EF-Tu optimally binds cognate  
52 aminoacyl-tRNAs compared with mischarged tRNAs (LaRiviere et al., 2001). These multiple and  
53 redundant pre-ribosomal proof-reading steps – solely concerned with the cognate pairing of the  
54 aminoacyl group to its tRNA – have been proposed as necessary since ribosomal proof-reading

55 mechanisms to date have exclusively been concerned with ensuring cognate codon-anticodon pairing  
56 (Morse et al., 2020; Zaher and Green, 2009a).

57

58 Regardless of these multiple proof-reading mechanisms, translational fidelity is relative (Ribas de  
59 Pouplana et al., 2014; Ruan et al., 2008). Most bacteria with the notable exception of a few proteo-  
60 bacteria such as *Escherichia coli* lack either the glutaminyl- or asparaginyl-tRNA synthetases, or both  
61 (Sheppard and Soll, 2008). Instead, a two-step indirect tRNA synthesis pathway, in which non-  
62 discriminatory glutamyl or aspartyl synthetases mischarge glutaminyl-tRNA with glutamate and  
63 asparaginyl-tRNA with aspartate respectively in the first step is used. At least in mycobacteria (which  
64 lack both synthetases), this results in baseline error rates specifically of glutamine to glutamate and  
65 asparagine to aspartate orders of magnitude higher than measured in *E. coli* (Javid et al., 2014;  
66 Manickam et al., 2014). The critical enzyme in the second step of the indirect pathway is GatCAB,  
67 whose function is to correct the mischarged aminoacyl moiety (Curnow et al., 1997). Despite its  
68 essential function, partial loss-of-function mutations in *gatCAB* can be readily selected in mycobacteria,  
69 occur naturally in clinical isolates of pathogenic *M. tuberculosis* (Cai et al., 2020; Su et al., 2016), and  
70 these mutant strains exhibit extremely high (up to 10%/codon) but specific rates of mistranslation (Su  
71 et al., 2016). Here, we investigated whether further fidelity factors can be identified in mycobacteria.  
72 We identified that the 16S ribosomal RNA (rRNA) methyltransferase *gidB* is necessary but not  
73 sufficient for discrimination of mischarged tRNAs in mycobacteria. Deletion of *gidB* only increased  
74 discrimination of misacylated tRNAs in mycobacteria with elevated mistranslation rates – due to  
75 mutation or environmental context – suggesting that non-methylation of rRNA may act to prevent  
76 catastrophic translational error.

77

## 78 **Results**

### 79 **A suppressor screen in mycobacteria identifies *gidB* as a potential translational fidelity factor**

80 We had previously identified via forward genetic screens strains of *Mycobacterium smegmatis* with  
81 extremely high specific rates of mistranslation due to mutations in the essential amidotransferase genes  
82 *gatCAB* (Cai et al., 2020; Su et al., 2016). We hypothesized that the mycobacterial genome may encode

83 for other ‘fidelity factors’ that may either enhance or reduce mistranslation specifically involving the  
84 indirect tRNA aminoacylation pathway. We designed a suppressor screen strategy on the background  
85 of a high mistranslator strain (Fig 1A). We focused on one strain, HWS19, with a three amino acid  
86 deletion in *gatA*, since this mutation caused the strain to have extremely high rates of translational error  
87 (Su et al., 2016). Aminoglycosides such as streptomycin are known to increase ribosomal decoding  
88 errors (Kramer and Farabaugh, 2007; Leng et al., 2015), and we wondered whether HWS19, with a  
89 high background mistranslation rate, but due to a different (pre-ribosomal) mechanism, is also more  
90 susceptible to streptomycin. Plating of equivalent colony forming units (CFU) of strain HWS19 on low-  
91 dose streptomycin-agar led to recovery of significantly fewer colonies compared with wild-type (Fig.  
92 S1), confirming HWS19 was hypersusceptible to streptomycin. The basis of our suppressor screen,  
93 therefore, was as follows: plating of HWS19 onto low-dose streptomycin-agar should select for strains  
94 with mutations that *decrease* mistranslation on this high mistranslating background (Fig. 1A, B). We  
95 plated  $1 \times 10^7$  CFU onto each of 6 agar plates containing 1  $\mu\text{g/mL}$  streptomycin. We sequenced the *rpsL*  
96 gene of survivors to exclude mutants that arose due to *de novo* resistance to streptomycin. Remaining  
97 survivors were transformed with a dual-luciferase reporter plasmid that measured specific  
98 mistranslation errors of asparagine for aspartate (Chen et al., 2019; Javid et al., 2014; Su et al., 2016)  
99 to identify low mistranslating candidates (Fig. 1B). We initially identified 4 suppressor mutants with  
100 lower mistranslation rates compared with the parent HWS19 strain, and comparable to wild-type *M.*  
101 *smegmatis* (Fig. 1C). Sequencing the strains revealed three had mutations in the 16S rRNA  
102 methyltransferase *gidB* (Msmeg\_6940) – Table S1. We subsequently sequenced just the *gidB* gene of a  
103 further 10 candidates and identified a further seven with a total of three additional independent  
104 mutations in *gidB* (Table S2). All but one of these further suppressors also had reduced mistranslation  
105 rates (Fig. S2).

106

### 107 **Deletion of *gidB* increases discrimination against misacylated tRNA in mycobacteria with high** 108 **mistranslation**

109 Since loss of function mutations in *GidB* can cause low-level streptomycin resistance in mycobacteria  
110 (Okamoto et al., 2007; Wong et al., 2013), we were concerned that our candidates from the screen may

111 represent selection against streptomycin. To determine whether the observed phenotype was  
112 independent of streptomycin selection, we deleted *gidB* in both the HWS19 and wild-type *M. smegmatis*  
113 backgrounds. Deletion strains were complemented with a chromosomally integrated plasmid expressing  
114 *gidB* (Fig. S3). We measured specific mistranslation rates using two complementary reporter systems:  
115 the dual-luciferase system, used in the initial screen, as well as a dual-fluorescent reporter system (Fig.  
116 S4) that uses flow cytometry to measure relative mistranslation rates and (Su et al., 2016). Measurement  
117 of specific mistranslation rates with both reporters verified that deletion of *gidB* significantly increased  
118 fidelity in strain HWS19, and this phenotype could be readily complemented (Fig. 2A, B). Surprisingly,  
119 deletion of *gidB* had no phenotype using the same reporters on a wild-type background (Fig. 2C, D).

120

121 Mycobacteria, due to their two-step indirect tRNA aminoacylation pathway physiologically misacylate  
122 glutaminy- and asparaginy- tRNAs in the first step (Curnow et al., 1997; Su et al., 2016). We wanted  
123 to investigate whether deletion of *gidB* in *Escherichia coli*, which does not employ the two-step  
124 pathway, and instead codes for the full set of 20 aminoacyl tRNA synthetases had a high fidelity  
125 phenotype. To mimic the high mistranslating environment of strain HWS19, we transformed the *E. coli*  
126 strain HK295 with one of two plasmids encoding non-discriminatory aminoacyl tRNA synthetases  
127 (ND-aaRSs): a non-specific aspartyl synthetase from *Deinococcus radiodurans*, that mischarges *E. coli*  
128 asparaginy- tRNA with aspartate (Chaudhuri et al., 2018; Ruan et al., 2008); and a non-discriminatory  
129 glutamyl synthetase from *Bacillus subtilis* that mischarges *E. coli* glutaminy- tRNA with glutamate  
130 (Ruan et al., 2008). Induction of the ND-aaRSs resulted in substantially elevated specific mistranslation  
131 rates in *E. coli*, as demonstrated previously (Ruan et al., 2008). However, deletion of *gidB* (Fig. S5) did  
132 not result in increased discrimination of these misacylated tRNAs (Fig. 2E, F).

133

### 134 **GidB is necessary for discrimination of mischarged tRNA under conditions that enrich for** 135 **relatively high mistranslation rates**

136 Deletion of *gidB* only had a phenotype under standard laboratory conditions in a high mistranslating  
137 mycobacterial mutant. Therefore, we decided to enrich isogenic populations of wild-type mycobacteria  
138 that have higher mistranslation rates than when grown under standard laboratory conditions and test

139 whether *gidB*-deletion had a phenotype under these conditions. We used a reporter in which the  
140 kanamycin kinase gene *aph* had been mutated at a critical aspartate residue that rendered it inactive,  
141 Aph-D214N (Boehr et al., 2001; Hon et al., 1997; Javid et al., 2014). Mycobacteria, including wild-  
142 type mycobacteria, expressing this reporter could survive in low-dose kanamycin due to the high basal  
143 (~ 1%/codon bulk average) mistranslation of asparagine to aspartate (Su et al., 2016), which would  
144 reconstitute a small proportion of fully active kanamycin kinase (Aph-N214D, i.e. wild-type enzyme).  
145 We compared the relative mistranslation rates of wild-type and *gidB*-deleted (on wild-type background)  
146 bacteria scraped from non-selective LB-agar or low-dose kanamycin agar. As before, *gidB*-deletion had  
147 no effect on the mistranslation rate on bacteria isolated from LB-agar. The average mistranslation rate  
148 of bacteria scraped from kanamycin-agar was higher, as predicted. In addition, from this context,  
149 deletion of *gidB* significantly increased translational fidelity (Fig. 3A).

150

151 We were unable to complement the strain in this experiment due to lack of appropriate selection  
152 markers. We therefore decided to test wild-type mycobacteria in a further environmental condition  
153 known to enrich for relatively high mistranslation rates. We had previously shown that a substantial  
154 minority of wild-type mycobacteria could survive and grow in bulk-lethal concentrations of rifampicin,  
155 due to two reversible and non-genetic mechanisms: increased mistranslation (Su et al., 2016) and a  
156 semi-heritable survival programme (Zhu et al., 2018) and not due to mutations causing *bona fide*  
157 rifampicin resistance. We plated bacteria on non-selective medium or rifampicin-agar. As before,  $\Delta$ *gidB*  
158 isolated from non-selective medium had no phenotype. However, bacteria that survived and grew on  
159 rifampicin-agar had increased rates of mistranslation, which reverted with deletion of *gidB*, in a fully  
160 complementable manner (Fig. 3B). To investigate whether deletion of *gidB* was sufficient for  
161 discrimination of mischarged tRNA in cells with higher mistranslation rates we re-analyzed bacteria  
162 with the highest (10%) and lowest (10%) green/red (i.e. relative mistranslation rates) ratios from the  
163 two experiments. Deletion of *gidB* had no observable phenotype on translational fidelity in bacteria  
164 isolated from non-selective media, even when only the cells with the highest apparent mistranslation  
165 rates were analysed (Fig. 3C,D), unlike bacteria enriched for higher mistranslation rates. Therefore,  
166 *gidB* deletion appears necessary, but not sufficient for translational fidelity, and it is only within

167 environmental contexts that enrich for high rates of mistranslation that deletion of *gidB* causes increased  
168 ribosomal discrimination of misacylated tRNA in otherwise wild-type mycobacteria.  
169  
170 Deletion of *gidB* increased discrimination of physiologically mischarged Glu-tRNA<sup>Gln</sup>. However, was  
171 discrimination of mischarged tRNA confined to misacylated tRNAs that would be encountered  
172 physiologically, or was it a general property that would allow discrimination of any mischarged tRNA,  
173 regardless of whether such a moiety would be encountered within a ‘natural’ context? We exploited the  
174 unique properties of alanyl tRNAs and their cognate synthetase. Unlike most aminoacyl tRNA  
175 synthetases, alanyl synthetase (AlaRS), does not rely on the anticodon of its cognate tRNAs as an  
176 identity element. The unique, and ubiquitous identity element of alanyl-tRNAs in all clades of life is a  
177 G<sup>3</sup>·U base-pair in the tRNA acceptor stem (Chong et al., 2018; Hou and Schimmel, 1988; Swairjo et  
178 al., 2004). This base-pair is necessary and sufficient for recognition and charging of any tRNA by  
179 AlaRS. Therefore, the anticodon of any alanyl-tRNA can be mutated to any triplet, and the tRNA will  
180 still be charged with aminoacyl-alanine (Chong et al., 2018) and will mediate specific translational  
181 errors. We had previously mutated the anticodon of a mycobacterial alanyl-tRNA to CCA, coding for  
182 tryptophan, which would result in specific mistranslation of alanine for tryptophan at UGG codons  
183 (Javid et al., 2014). To measure specific mistranslation, we modified the dual-luciferase reporter system.  
184 We identified a critical alanine residue in Renilla luciferase, which, when mutated to tryptophan  
185 (A214W), resulted in >20-fold decrease in activity (Fig. S6). This reporter would thus be able to  
186 discriminate mistranslation errors greater than 5%/codon of tryptophan to alanine. We transformed the  
187 mutant alanyl-tRNA (tRNA<sub>CCA</sub><sup>Ala</sup>), cloned into a tetracycline-inducible plasmid (termed EMAW –  
188 ‘excess mistranslation of alanine for tryptophan’), into wild-type and  $\Delta$ *gidB* *M. smegmatis*, along with  
189 the specific dual-luciferase reporters. Induction of tRNA<sub>CCA</sub><sup>Ala</sup> resulted in increased specific  
190 mistranslation of tryptophan for alanine, as expected. Deletion of *gidB* did not increase translational  
191 fidelity, even in this high mistranslating context (Fig. 3E). However, transformation of EMAW and  
192 reporters into HWS19 confirmed that in this strain with high rates of ‘physiological’ mistranslation,  
193 deletion of *gidB* allowed ribosomes to further discriminate against even non-physiologically  
194 mischarged tRNAs (Fig. 3F). Taken together, these results suggested deletion of *gidB* was necessary



195 but not sufficient for discrimination of mischarged tRNAs and that a further environmental context,  
196 possibly generated via excess ‘physiological’ mistranslation or some other stressor was also required.

197

### 198 **Deletion of *gidB* causes reduced tolerance to rifampicin**

199 Finally, we wished to test the potential physiological relevance of increased translational fidelity caused  
200 by *gidB* deletion. We had previously demonstrated that increased, specific, mistranslation due to the  
201 mycobacterial indirect tRNA aminoacylation pathway caused increased tolerance to the antibiotic  
202 rifampicin due to mistranslation of critical residues in the drug target, RpoB (Javid et al., 2014; Su et  
203 al., 2016). Since antibiotic tolerance is mediated by a subpopulation of bacteria that resist killing (Abel  
204 Zur Wiesch et al., 2015; Aldridge et al., 2014; Brauner et al., 2016; Gold and Nathan, 2017; Hicks et  
205 al., 2018; Richardson et al., 2016; Safi et al., 2019; Vijay et al., 2020; Vilcheze et al., 2017; Wakamoto  
206 et al., 2013; Wang et al., 2020), we hypothesised that deletion of *gidB* would render the most tolerant  
207 subpopulation susceptible to rifampicin. Measuring survival of *M. smegmatis* exposed to rifampicin in  
208 axenic culture, deletion of *gidB* resulted in significantly increased killing in both the high mistranslating  
209 strain HWS19 and in wild-type mycobacteria (Fig. 3G, H).

210

### 211 **Discussion**

212 The ubiquitous presence of multiple and redundant proof-reading mechanisms for protein synthesis  
213 underscores the importance of accurate protein synthesis in cellular homeostasis. However, errors in  
214 protein synthesis are both more pervasive and frequent than previously anticipated, and increasingly,  
215 translational errors are being recognised as a mechanism for adaptation to hostile environments. One  
216 possible resolution of these two seemingly opposed processes is the recognition that ‘optimal’ fidelity  
217 is not as low as possible and is context-specific (Ribas de Pouplana et al., 2014; Schwartz and Pan,  
218 2017; Tollerson and Ibba, 2020). For example, infection by *Salmonella* mutants with both impaired and  
219 enhanced translational fidelity were less productive than wild-type strains (Fan et al., 2019), and  
220 mycobacterial strains with extremely high mistranslation rates due to mutations in *gatA* grew more  
221 slowly than wild-type in axenic culture, but had orders of magnitude greater survival with rifampicin  
222 treatment (Su et al., 2016).

223

224 In this study we sought to identify further translational fidelity factors in mycobacteria, which we had  
225 previously shown have high, but specific rates of mistranslation due to the indirect tRNA  
226 aminoacylation pathway required for aminoacylation of glutaminyl- and asparaginyl-tRNAs (Cai et al.,  
227 2020; Chaudhuri et al., 2018; Su et al., 2016). Our screen identified loss-of-function mutations in *gidB*  
228 conferring increased fidelity to errors generated by mutants in this pathway. GidB is a known  
229 methyltransferase that confers m<sup>7</sup>G methylation to the guanosine at position 507 (*M. smegmatis*  
230 numbering) on 16S rRNA (Okamoto et al., 2007; Shippy and Fadl, 2015; Wong et al., 2013). Despite  
231 its universal conservation in bacteria (Okamoto et al., 2007), it is not essential for *in vitro* growth  
232 (Shippy and Fadl, 2015), suggesting critical functions that are not necessary for growth under standard  
233 laboratory conditions. We had previously shown that deletion of *gidB* in *M. tuberculosis* increased  
234 fidelity of ‘wobble’ ribosomal decoding errors, but not for mistranslation of asparagine for aspartate –  
235 one of the two specific errors in mycobacteria due to the indirect tRNA pathway (Wong et al., 2013).  
236 Those studies, performed with otherwise wild-type mycobacteria under standard laboratory conditions,  
237 mimic similar conditions where in this study *gidB* deletion also lacked a phenotype (Fig. 2).

238

239 The ribosome has several proof-reading mechanisms (Zaher and Green, 2009a). At initial selection of  
240 aminoacyl-tRNA and prior to the GTP hydrolysis that catalyzes peptide bond formation, non-cognate  
241 (to the mRNA codon) aminoacyl tRNAs are rejected (Pape et al., 1998). A second proof-reading step  
242 occurs after GTP hydrolysis, but prior to peptide bond formation (Morse et al., 2020). A further proof-  
243 reading step after peptide bond formation with a non-cognate aminoacyl-tRNA donor can result in  
244 abortive termination of protein synthesis (Zaher and Green, 2009b). However, all these ribosomal proof-  
245 reading mechanisms serve to preserve the accuracy of cognate mRNA codon-tRNA anticodon  
246 interactions, whereas mischarged tRNAs, by definition, have cognate codon-anticodon contact. A study  
247 of A-site binding of a set of 4 different tRNA backbones each esterified with 4 aminoacyl groups failed  
248 to identify a substantial contribution of the aminoacyl identity on ribosome binding (Dale and  
249 Uhlenbeck, 2005). A subsequent study of a more diverse set of tRNAs did find that the ribosomal A  
250 site does confer specificity for aminoacyl-tRNAs (Dale et al., 2009), but did not specifically address

251 the question of proof-reading of misacylated tRNA. Cornish and colleagues used an elegant biochemical  
252 approach to investigate interaction of the ribosome with mischarged but otherwise natural tRNAs using  
253 di-peptide formation assays and small molecule FRET (Effraim et al., 2009). Although overall there  
254 were few differences in ribosome dynamics between cognately charged and mischarged aminoacyl  
255 tRNAs, there were subtle differences in some mischarged tRNAs, notably a small (2-3 fold) increase in  
256 A-site sampling by some mischarged tRNAs (Effraim et al., 2009). This is particularly interesting given  
257 the recent description that some aminoacyl tRNA·EF-Tu·GTP ternary complexes repeatedly engage  
258 with the ribosome during the second proof-reading step of peptide-bond formation (Morse et al., 2020).  
259 Our prior studies with the unusual aminoglycoside kasugamycin (Chaudhuri et al., 2018) also suggest  
260 ribosomes can discriminate against mischarged tRNAs. Kasugamycin was known to decrease ribosomal  
261 decoding errors (Schuwirth et al., 2006; van Buul et al., 1984) in direct contrast with the increased errors  
262 witnessed with other aminoglycosides such as streptomycin. We showed that kasugamycin, at  
263 concentrations that did not inhibit protein synthesis, could decrease mistranslation from mischarged  
264 tRNAs not only in live mycobacteria, but also in a cell-free *in vitro* translation system, which had been  
265 modified to include excess mischarged Asp-tRNA<sup>Asn</sup> (Chaudhuri et al., 2018).

266

267 We do not know the precise molecular mechanism by which deletion of *gidB* increases ribosomal  
268 discrimination of mischarged tRNAs. Given the target methylation site for GidB is located in the  
269 decoding centre, one can conceive a mechanism by which lack of 16S methylation promotes increased  
270 resampling of the A-site, and subsequently rejection of mischarged tRNA ternary complexes prior to  
271 peptide bond formation. Furthermore, it was notable that deletion of *gidB* was necessary, but  
272 insufficient for discrimination of mischarged tRNAs. Only mycobacteria with increased mistranslation  
273 rates – either via mutation or from an environmental context in which higher mistranslation rates are  
274 favoured – had a high fidelity phenotype in the absence of *gidB*. This extended to discrimination of  
275 mischarged tRNAs that are not naturally occurring, such as Ala-tRNA<sub>CCA</sub><sup>Ala</sup>. However, deletion of *gidB*  
276 did not lead to similar phenotypes in *E. coli*: regardless of whether the bacteria were experiencing high  
277 mistranslation rates or not – although the two types of excess mistranslation we tested mimicked the  
278 indirect tRNA aminoacylation pathway that is not present in *E. coli*, and hence ‘unnatural’ in the context

279 of that species. Oxidative stress leads to accumulation of toxic non-coded amino-acids in *E. coli*  
280 (Bullwinkle et al., 2014), therefore it is tempting to speculate *gidB* deletion in that context may have a  
281 discriminatory phenotype. What further changes to ribosomal composition or function are required for  
282 lack of GidB-mediated methylation to effectively discriminate against mischarged tRNAs? We and  
283 others have recently described alternative bacterial ribosomes that are particularly adapted to stressful  
284 environments – such environments are also associated with relaxation of translational fidelity (Chen et  
285 al., 2020; Kurylo et al., 2018; Parks et al., 2018). However, multiple forms of alternative ribosomes  
286 have been identified: comprising altered stoichiometry of ribosomal protein subunits, variant subunits  
287 or alternative rRNA composition (Dinman, 2016; Emmott et al., 2019). Which, if any of these  
288 alternatives contribute to increased fidelity in absence of GidB-mediated rRNA methylation will be the  
289 subject of ongoing study.

290

291 Deletion of *gidB* causes increased mycobacterial susceptibility to rifampicin. Since lack of *gidB*  
292 decreases both wobble misreading (Wong et al., 2013), as well as discrimination of mischarged tRNA,  
293 which function is responsible? Several lines of evidence suggest discrimination of mischarged tRNAs  
294 is more likely. First, we have previously demonstrated that increased discrimination of mischarged  
295 tRNA by kasugamycin is responsible for enhanced mycobacterial susceptibility to rifampicin *in vitro*  
296 (Chaudhuri et al., 2018). Secondly, the magnitude of increased susceptibility of  $\Delta$ *gidB* is greater in  
297 strain HWS19, in which the vast majority of error is derived from mischarged tRNA. Finally, the  
298 absolute error rates of ribosomal decoding errors in mycobacteria, including wobble mistranslation, are  
299 much lower than for errors due to mischarged tRNA (Javid et al., 2014; Leng et al., 2015), making the  
300 latter mechanism more parsimonious.

301

302 Emerging data suggest absolute fidelity in protein synthesis is not desirable, not only from an efficiency  
303 perspective, but also because relaxed fidelity is associated with adaptation to hostile environments.  
304 Although moderate mistranslation rates may be adaptive under stress, excessive mistranslation is still  
305 harmful. Therefore, mechanisms that are permissive for moderate but not excessive mistranslation may  
306 serve an important function in bacterial environmental adaptation. Ribosomal RNA methylation may

307 be reversible (Sloan et al., 2017), although definitive evidence is not available. Since lack of methylation  
308 by GidB is only effective at increasing ribosomal discrimination against mischarged tRNA under  
309 contexts of high mistranslation, it may serve as a brake for runaway mistranslation and error catastrophe.

310

## 311 **METHODS**

### 312 ***Mycobacterium smegmatis* strains**

313 WT *M. smegmatis* mc<sup>2</sup>-155 (Snapper et al., 1990) and its derivatives were cultured in Middlebrook 7H9  
314 Broth supplemented with 0.2% glycerol, 10% ADS (albumin-dextrose-salt) and 0.05% Tween-80 with  
315 corresponding antibiotics when required in a 37 °C, 220 rpm shaker. LB agar was used for plating in  
316 37°C incubator.

317

### 318 ***Escherichia coli* strains**

319 HK295 and its derivatives were cultured in LB Broth with corresponding antibiotics when required in  
320 a 37°C, 220 rpm shaker except when otherwise mentioned. LB agar was used for plating in 37 °C  
321 incubator except when otherwise mentioned. DH5 $\alpha$  and TOP10 were used for transformation of  
322 plasmids and amplification.

323

## 324 **METHOD DETAILS**

### 325 **Suppressor screen.**

326 A total of around  $1 \times 10^7$  colony forming units (C.F.U) HWS19 were plated onto each of 6 LB agar plates  
327 containing 1 $\mu$ g/mL streptomycin. After 5 days, visible colonies were picked for further analysis. The  
328 *rpsL* gene was amplified by PCR and sequenced, those with wild-type *rpsL* were transformed with  
329 Renilla-Firefly dual luciferase reporter plasmids (Renilla-Firefly WT and Renilla-Firefly D214N).  
330 Specific mistranslation rates of asparagine for aspartate were measured in potential suppressor  
331 candidates to identify low mistranslating strains compared with HWS19. Genomic DNA was isolated  
332 from HWS19 and four suppressor candidates by standard methods, and were then whole-genomes  
333 sequenced and analyzed by Genewiz. Mapping results of mutations onto genes covering over 99% of

334 all reads in four suppressor candidates are shown as Table S1. A further 10 suppressor candidates had  
335 only *gidB* sequenced as per Table S2.

### 336 **Deletion of *gidB* and complementation in *Mycobacterium smegmatis***

337 The 500 bp upstream and downstream regions of *gidB* were amplified from mc<sup>2</sup>-155 genomic DNA.  
338 The zeocin resistance cassette was amplified from plasmid pKM-Zeo-Lox (A kind gift from Eric J.  
339 Rubin lab). Then the zeocin resistance cassette flanking 500 bp upstream and 500 bp downstream region  
340 of *gidB* were assembled by overlapping extension PCR for use as an allele exchange substrate (AES),  
341 which was verified by sequencing. WT mc<sup>2</sup>-155 and HWS19 transformed with  
342 pNIT(kan)::RecET::sacB recombineering plasmid were grown to OD<sub>600</sub>~0.4, and expression of recET  
343 was induced with 10 µM isovaleronitrile (IVN) for 5 h, then competent cells were made by standard  
344 methods and transformed with 2 µg of the AES. The cells were recovered for 4 h and selected on LB  
345 agar plates containing 20 µg/mL zeocin. The recombinants were confirmed by PCR for verifying the  
346 zeocin cassette integration and the appropriate genomic context (Figure S3). *gidB* deletion strains were  
347 then cured of the recombinase plasmid prior to further experiments.

348

349 For *gidB* complementation construction, several plasmids were constructed. The chromosome  
350 integrating mycobacterial plasmid pML1357 (Addgene #32378) was used as the backbone vector. The  
351 hygromycin resistance cassette was replaced with a kanamycin resistance cassette and streptomycin  
352 resistance cassette as pKML1357 and pSML1357 respectively. *gidB* from wild-type *M. smegmatis* with  
353 and without native promoter were amplified and cloned into integrative plasmids pKML1357/  
354 pSML1357 to construct pKML1357-Pnative\_*gidB*, pKML1357-Psmyc\_*gidB*, pSML1357-Pnative-  
355 *gidB*. Then the plasmids were transformed into  $\Delta$ *gidB* strains and selected onto LB agar with  
356 corresponding antibiotics for *gidB* complementation strains.  $\Delta$ *gidB*::Pnative\_*gidB* (KanR) strains were  
357 used for dual luciferase mistranslation assay when measuring N to D and Q to E mistranslation rates.  
358  $\Delta$ *gidB*::Psmyc\_*MsmgidB* (KanR) were used for the dual-fluorescence mistranslation assay.  
359  $\Delta$ *gidB*::Pnative\_*gidB* (StrepR) strains were used for dual-luciferase mistranslation assays when  
360 measuring W to A mistranslation as the pACET-Renilla-Firefly construct carries a kanamycin

361 resistance marker. In addition, *gidB* mRNA levels in *gidB* deletion and complementation strains were  
362 verified by RT-qPCR (Figure S3).

363

#### 364 **Deletion of *gidB* and complementation in *Escherichia coli***

365 *E. coli* HK295 was used as *E. coli* wild-type strain – a kind gift from the Beckwith lab (Kadokura and  
366 Beckwith, 2002). HK295 was transformed with temperature-sensitive pKD46 plasmid (kind gift from  
367 Ting Zhu lab). Hygromycin resistance cassette was amplified from pML1357 with primers containing  
368 50bp upstream and 50bp downstream of *gidB* as AES (50up-hygR-50down) and verified by sequencing.  
369 HK295 with pKD46 was cultured at 30°C overnight and was diluted 100-fold and sub-cultured into  
370 50ml low-salt LB in a 30°C shaker until OD<sub>600</sub>~0.1, 0.1% arabinose was then added for inducing the  
371 expression of recombinase and transferred into 37°C shaker for 1 hour. Then competent cells were made  
372 by standard electro-transformation method and transformed with 2µg AES PCR product. The cells were  
373 recovered in 30°C for 3 hours and selected onto LB agar plates containing 150 µg/ml Hygromycin in  
374 37°C incubator. The strain construction was then confirmed by PCR (Figure S5). The *gidB* deletion  
375 strain was then cured of pKD46 at 42°C prior to further experiments.

376

377 For *gidB* complementation construction, *E. coli gidB* was amplified with primers containing J23100  
378 promoter (Anderson promoter library, <http://parts.igem.org/Promoters/Catalog/Anderson>) by PCR and  
379 was cloned into r6kg-HK022-attp plasmid – a kind gift from Qiong Wu Lab (Yao et al., 2019) as r6kg-  
380 HK022-attp-*gidB*. HK295- $\Delta$ *gidB* was transformed with pRPA001 S-IntHK – a kind gift from Qiong  
381 Wu Lab (Yao et al., 2019), from which competent cells were made and it was then transformed with  
382 r6kg-HK022-attp-*gidB* followed by recovering at 37°C for 1 hour and selected onto LB agar containing  
383 25µg/mL chloramphenicol. The complementation strain was verified by PCR in terms of the integration  
384 and appropriate genome context. In addition, *gidB* mRNA levels in *gidB* deletion and complementation  
385 strains were verified by RT-qPCR (Figure S5).

386

#### 387 **Measuring mistranslation rates with Renilla-Firefly dual-luciferase reporters**



388 For measuring mistranslation rates in *M. smegmatis*, the shuttle plasmids pTetG-Renilla-Firefly (WT),  
389 pTetG-Renilla-D120N-Firefly, pTetG-Renilla-E144Q-Firefly under control of a tetracycline-inducible  
390 promoter were used as previously (Javid et al., 2014). For measurement of tryptophan to alanine  
391 mistranslation rates, the mycobacterial chromosome integrating plasmid pACET-Renilla-Firefly,  
392 where expression of the reporter is under control of an acetamide-inducible promoter was used (Javid  
393 et al., 2014). The *Renilla* gene was mutated by site-directed mutagenesis to Renilla-A214W. For  
394 measuring mistranslation rates in *E. coli*, pEK4 (WT) was used – a kind gift from Philip Farabaugh lab  
395 (Kramer and Farabaugh, 2007). pEK4-Ren-D120N and pEK4-Ren-E144Q were constructed by site-  
396 directed mutagenesis. In all cases, the dual-luciferase kit (Promega) was used for measuring Renilla and  
397 Firefly luciferase activity.

398

399 In mycobacteria, the assay was performed as previously (Su et al., 2016). Briefly, strains with  
400 pTetG-Renilla-Firely were cultured to OD<sub>600</sub>>3, and diluted to OD<sub>600</sub>~0.2 into fresh 7H9 medium  
401 supplemented with 50µg/ml hygromycin and 100 ng /ml anhydrotetracycline for inducing dual  
402 luciferase. After 7-8 hours, cells were collected by centrifugation at 12000rpm for 3min, lysed with  
403 40µL passive lysis buffer in 96-well white flat bottom plate for 20-30min (plate shaking at 400rpm,  
404 room temperature), then reacted with 50µL substrate Firefly reagents, 360rpm shaken 5s followed by  
405 measuring the Firefly luminescence by Fluoroskan Ascent FL luminometer with 1000ms integration  
406 time. Then 50µL Stop&Glo reagent was added followed by measuring the Renilla luminescence  
407 immediately. For strains with pACET-Renilla-Firely and pTet-tRNA<sub>CCA</sub><sup>Ala</sup>, the strains in experimental  
408 group were diluted to OD<sub>600</sub>~0.2 into fresh 7H9 medium supplemented with 50µg/ml hygromycin,  
409 20% acetamide and 100ng/mL anhydrotetracycline for inducing dual luciferase and tRNA<sub>CCA</sub><sup>Ala</sup>  
410 respectively. The later procedures were same as above. The corrected Renilla/Firefly representing the  
411 mistranslation level is calculated as follows: Corrected Renilla / Firefly (N to D) =  
412  $\frac{Renilla(D120N)/Firefly}{Renilla(WT)/Firefly}$ , Corrected Renilla / Firefly (Q to E) =  $\frac{Renilla(E144Q)/Firefly}{Renilla(WT)/Firefly}$ , Corrected Renilla /  
413 Firefly (W to A) =  $\frac{Renilla(A214W)/Firefly}{Renilla(WT)/Firefly}$ .

414



415 In *E. coli*, HK295 and its derivatives with pBAD43-*Bs.gltX* (or pBAD-*Dr.AspRS* or pBAD-empty) and  
416 pEK4-RenFF WT (or D120N or E144Q) were cultured overnight. The cells were diluted 1000-fold and  
417 sub-cultured into fresh LB supplemented with 0.1% arabinose, 100µg/mL spectinomycin, 100µg/mL  
418 ampicillin for 3 hours, then 1mM IPTG was added for inducing dual-luciferase. After 1.5 hours, cells  
419 were collected, lysed, reacted with substrate reagents, using the protocol above with the exception that  
420 lysis duration was 15min. Luminescence was measured by Fluoroskan Ascent FL luminometer with  
421 40ms integration time. Data analysis was same as *M. smegmatis*.

422

### 423 **Measuring mistranslation rates with dual-fluorescence reporters**

424 The pUVtetOR-GLR (green-linker-red) reporter was adapted as previously (Su et al., 2016) with some  
425 modifications. Briefly, a mutated green fluorescent protein (E222Q) was fused to wild-type monomeric  
426 red fluorescent protein (mRFP) with a flexible GGSGGGGGSSGG linker. A C-terminal tag  
427 (AANDENYAAAV) targeting the protein for proteolytic degradation (Andersen et al., 1998) was added  
428 by PCR.

429

430 The procedure of measuring relative mistranslation rates by flow cytometry as previously (Su et al.,  
431 2016) with some modifications. Strains with pUVtetOR-GLR were cultured to OD<sub>600</sub>~0.2 and then  
432 100ng/ml ATc was added for inducing dual-fluorescence. After 3 hours, cells were diluted into 1mL  
433 PBS to OD<sub>600</sub>~0.05. The GFP and RFP signals of the sample were collected by flow cytometry (BD  
434 LSR Fortessa), being excited/ detected by 488nm/520nm laser line and 561nm/585nm laser line  
435 respectively. For the strains after high mistranslating selection: Strains expressing pSML1357-  
436 *Aph\_D214N* and pUVtetOR-GLR were spread onto LB agar containing 50µg/ml Hygromycin and  
437 2µg/ml Kanamycin as experimental group and LB agar containing only 50µg/ml Hygromycin as control  
438 group. After 5 days, colonies were scraped from the plates and cultured into 7H9 with 100ng/ml ATc  
439 for 3 hours. The following procedures were same as above. For the strains under rifampicin condition:  
440 strains with pUVtetOR-GLR were spread onto LB agar no selection plates and LB agar containing  
441 20µg/ml rifampicin. After 5 days, colonies were then scraped from the plates and cultured into 7H9

442 with 100ng/ml ATc for 3 hours. The following procedures were same as above. Data were analyzed by  
443 FlowJo 10.4 for Windows 10. The gating strategy was as follows: Live bacteria were gated to eliminate  
444 debris as P1 based on SSC-A and FSC-A, then stringent gating on single cells was applied using a  
445 tandem gating strategy based on FSC-A and FSC-H as P2, subsequently using SSC-A and SSC-H as  
446 P3. Single cells with positive red fluorescence were acquired as P4 based on the red fluorescence signal.  
447 See Figure S4. Relative mistranslation rates were analysed as a histogram of GFP/ RFP ratio as P5 .  
448 The mean values of GFP/RFP ratio were calculated by FlowJo software.

449

450

#### 451 **Construction of plasmids containing non-discriminatory synthetase**

452 Non-discriminatory glutamyl-synthetase from *Bacillus subtilis* (*Bs. gltX*) and aspartyl-synthetase from  
453 *Deinococcus radiodurans* (*Dr. AspRS*) were codon-optimized and synthesized by Genwiz and were  
454 cloned into *E. coli* expression vector pBAD43. *Bs.gltX* and *Dr.AspRS* were amplified by primers with  
455 20bp overlap to the vector and ligated to the EcoRI / XbaI-digested-vector respectively using Gibson  
456 method where the inserts were under control of arabinose-inducible promoter.

457

#### 458 **Rifampicin time-kill curve assay**

459 WT and strain HWS19 *M. smegmatis* were cultured in 7H9 medium until OD600~1. Cells were diluted  
460 to OD600~0.3 into fresh 7H9 medium containing 20µg/ml rifampicin and cultured into 37°C, 220rpm  
461 shaker. Prior to addition of rifampicin, an aliquot was removed for calculation of cell numbers at time  
462 zero. At indicated time points, aliquots were taken, washed 3x in PBS and resuspended in PBS prior to  
463 being plated onto LB-agar. At least 3 10-fold dilutions were plated per time point. After 3-5 days,  
464 visible colonies were counted. The counts at different time points were normalized by counts at time  
465 zero for analysis.

466

#### 467 **QUANTIFICATION AND STATISTICAL ANALYSIS**

468 All statistical methods are described in figures legends, presented as mean with SD. The p values and  
469 statistical significance were calculated using GraphPad prism software. Two-tailed unpaired Student's  
470 t test was used to compare means between groups. \*\*\*p<0.001, \*\*p<0.01, \*p<0.05, ns p>0.05.

471

472

#### 473 **Author contributions**

474 HWS optimised the conditions of and performed the initial screen. ZB performed the majority of  
475 experiments with some assistance from JYH. BJ conceived of and supervised the study. ZB and BJ  
476 wrote the manuscript with input from the other authors.

477

#### 478 **Acknowledgements**

479 We would like to thank Yuemeng Chen for construction of the dual-fluorescent reporter and the  
480 Tsinghua flow cytometry core for technical assistance. This study was in part funded by grants from  
481 the Bill & Melinda Gates Foundation (OPP1109789) and funds from Tsinghua University School of  
482 Medicine to BJ and ZB. BJ is a Wellcome Trust Investigator (207487/C/17/Z).

483

484 **Supplementary information-Tables**

485

486 **Table S1: Mutations identified in suppressors by whole-genome sequencing**

487

| Strain         | Position | Reference | Variant | Gene        | Mutation               | Function                      |
|----------------|----------|-----------|---------|-------------|------------------------|-------------------------------|
| <b>SupC-1</b>  | 6155361  | CGAGCGACT | -       | MSMEG_6091  | Protein 50-53 deletion | Clp protease                  |
|                | 6983026  | C         | -       | <i>gidB</i> | E138 Frameshift        | Methyltransferase of 16S rRNA |
| <b>SupC-3</b>  | 6155361  | CGAGCGACT | -       | MSMEG_6091  | Protein50-53 deletion  | Clp protease                  |
|                | 6983324  | -         | CCGGCG  | <i>gidB</i> | Frameshift insertion   | Methyltransferase of 16S rRNA |
| <b>SupC-4</b>  | 967091   | A         | T       | groL1       | D520V                  | Chaperonin 1                  |
|                | 6983026  | C         | -       | <i>gidB</i> | E138 Frameshift        | Methyltransferase of 16S rRNA |
| <b>SupC-23</b> | 19745    | C         | T       | MSMEG_0019  | P232S                  | Mycobactin biosynthesis       |
|                | 1502154  | G         | A       | <i>tuf</i>  | G248S                  | Elongation factor Tu          |
|                | 3879114  | A         | C       | <i>uvrA</i> | V568G                  | Excinuclease ABC subunit UvrA |
|                | 4172874  | C         | T       | MSMEG_4095  | G62S                   | Putative monooxygenase        |
|                | 6155361  | CGAGCGACT | -       | MSMEG_6091  | Protein 50-53 deletion | Clp protease                  |

488

489

490

491 **Table S2. Additional suppressors with mutations in *gidB***

492

| Strain            | Position(aa) | Reference | Variant | Mutation            |
|-------------------|--------------|-----------|---------|---------------------|
| C12, C24          | 135          | GAGATG    | -AGATG  | Deletion frameshift |
| C7, C10, C14, C21 | 53           | CACATC    | CGCATC  | H53R                |
| C22               | 153          | CGGTGG    | CGGTGA  | W153Stop            |

493

494

495 **Table S3 Oligonucleotide sequences of primers**

496

| Name                                 | Sequence (5'-3')              |
|--------------------------------------|-------------------------------|
| Msm- $\Delta$ <i>gidB</i> -verify-P1 | CCCAAGAAGCGGAAACGATGAC        |
| Msm- $\Delta$ <i>gidB</i> -verify-P2 | TACCTCTCGATCCTCGGCAC          |
| Msm- $\Delta$ <i>gidB</i> -verify-P3 | CTGATGAACAGGGTCACGTCG         |
| Eco- $\Delta$ <i>gidB</i> -verify-P1 | GCTGAAAAAACAGGGTATGCTGCGTCGT  |
| Eco- $\Delta$ <i>gidB</i> -verify-P2 | GGGCAACAAAGCGATTTCATCTTCCGGCA |
| Eco- $\Delta$ <i>gidB</i> -verify-P3 | CTCATCACCAGGTAGGGCCACGGCCA    |

497

498

499

500

501

## 502 References

- 503 Abel Zur Wiesch, P., Abel, S., Gkatzis, S., Ocampo, P., Engelstadter, J., Hinkley, T., Magnus, C., Waldor,  
504 M.K., Udekwu, K., and Cohen, T. (2015). Classic reaction kinetics can explain complex patterns of  
505 antibiotic action. *Science translational medicine* 7, 287ra273.
- 506 Aldridge, B.B., Keren, I., and Fortune, S.M. (2014). The Spectrum of Drug Susceptibility in  
507 Mycobacteria. *Microbiology spectrum* 2.
- 508 Andersen, J.B., Sternberg, C., Poulsen, L.K., Bjorn, S.P., Givskov, M., and Molin, S. (1998). New unstable  
509 variants of green fluorescent protein for studies of transient gene expression in bacteria. *Appl Environ*  
510 *Microbiol* 64, 2240-2246.
- 511 Boehr, D.D., Thompson, P.R., and Wright, G.D. (2001). Molecular mechanism of aminoglycoside  
512 antibiotic kinase APH(3')-IIIa: roles of conserved active site residues. *J Biol Chem* 276, 23929-23936.
- 513 Brauner, A., Fridman, O., Gefen, O., and Balaban, N.Q. (2016). Distinguishing between resistance,  
514 tolerance and persistence to antibiotic treatment. *Nat Rev Microbiol* 14, 320-330.
- 515 Bullwinkle, T.J., Reynolds, N.M., Raina, M., Moghal, A., Matsa, E., Rajkovic, A., Kayadibi, H., Fazlollahi,  
516 F., Ryan, C., Howitz, N., *et al.* (2014). Oxidation of cellular amino acid pools leads to cytotoxic  
517 mistranslation of the genetic code. *Elife* 3.
- 518 Cai, R.J., Su, H.W., Li, Y.Y., and Javid, B. (2020). Forward Genetics Reveals a *gatC-gatA* Fusion  
519 Polypeptide Causes Mistranslation and Rifampicin Tolerance in *Mycobacterium smegmatis*. *Front*  
520 *Microbiol* 11, 577756.
- 521 Chaudhuri, S., Li, L., Zimmerman, M., Chen, Y., Chen, Y.X., Toosky, M.N., Gardner, M., Pan, M., Li, Y.Y.,  
522 Kawaji, Q., *et al.* (2018). Kasugamycin potentiates rifampicin and limits emergence of resistance in  
523 *Mycobacterium tuberculosis* by specifically decreasing mycobacterial mistranslation. *Elife* 7.
- 524 Chen, Y.X., Pan, M., Chen, Y.M., and Javid, B. (2019). Measurement of Specific Mycobacterial  
525 Mistranslation Rates with Gain-of-function Reporter Systems. *J Vis Exp*.
- 526 Chen, Y.X., Xu, Z.Y., Ge, X., Sanyal, S., Lu, Z.J., and Javid, B. (2020). Selective translation by alternative  
527 bacterial ribosomes. *Proc Natl Acad Sci U S A* 117, 19487-19496.
- 528 Chong, Y.E., Guo, M., Yang, X.L., Kuhle, B., Naganuma, M., Sekine, S.I., Yokoyama, S., and Schimmel, P.  
529 (2018). Distinct ways of G:U recognition by conserved tRNA binding motifs. *Proc Natl Acad Sci U S A*  
530 115, 7527-7532.
- 531 Chong, Y.E., Yang, X.L., and Schimmel, P. (2008). Natural homolog of tRNA synthetase editing domain  
532 rescues conditional lethality caused by mistranslation. *J Biol Chem* 283, 30073-30078.
- 533 Curnow, A.W., Hong, K., Yuan, R., Kim, S., Martins, O., Winkler, W., Henkin, T.M., and Soll, D. (1997).  
534 Glu-tRNA<sup>Gln</sup> amidotransferase: a novel heterotrimeric enzyme required for correct decoding of  
535 glutamine codons during translation. *Proc Natl Acad Sci U S A* 94, 11819-11826.
- 536 Dale, T., Fahlman, R.P., Olejniczak, M., and Uhlenbeck, O.C. (2009). Specificity of the ribosomal A site  
537 for aminoacyl-tRNAs. *Nucleic Acids Res* 37, 1202-1210.
- 538 Dale, T., and Uhlenbeck, O.C. (2005). Binding of misacylated tRNAs to the ribosomal A site. *RNA* 11,  
539 1610-1615.
- 540 Dinman, J.D. (2016). Pathways to Specialized Ribosomes: The Brussels Lecture. *J Mol Biol* 428, 2186-  
541 2194.
- 542 Drummond, D.A., and Wilke, C.O. (2009). The evolutionary consequences of erroneous protein  
543 synthesis. *Nat Rev Genet* 10, 715-724.
- 544 Effraim, P.R., Wang, J., Englander, M.T., Avins, J., Leyh, T.S., Gonzalez, R.L., Jr., and Cornish, V.W.  
545 (2009). Natural amino acids do not require their native tRNAs for efficient selection by the ribosome.  
546 *Nat Chem Biol* 5, 947-953.
- 547 Emmott, E., Jovanovic, M., and Slavov, N. (2019). Ribosome Stoichiometry: From Form to Function.  
548 *Trends in biochemical sciences* 44, 95-109.
- 549 Evans, C.R., Fan, Y., Weiss, K., and Ling, J. (2018). Errors during Gene Expression: Single-Cell  
550 Heterogeneity, Stress Resistance, and Microbe-Host Interactions. *mBio* 9.

- 551 Fan, Y., Evans, C.R., Barber, K.W., Banerjee, K., Weiss, K.J., Margolin, W., Igoshin, O.A., Rinehart, J., and  
552 Ling, J. (2017). Heterogeneity of Stop Codon Readthrough in Single Bacterial Cells and Implications for  
553 Population Fitness. *Mol Cell* 67, 826-836 e825.
- 554 Fan, Y., Thompson, L., Lyu, Z., Cameron, T.A., De Lay, N.R., Krachler, A.M., and Ling, J. (2019). Optimal  
555 translational fidelity is critical for *Salmonella* virulence and host interactions. *Nucleic Acids Res* 47,  
556 5356-5367.
- 557 Fan, Y., Wu, J., Ung, M.H., De Lay, N., Cheng, C., and Ling, J. (2015). Protein mistranslation protects  
558 bacteria against oxidative stress. *Nucleic Acids Res* 43, 1740-1748.
- 559 Gold, B., and Nathan, C. (2017). Targeting Phenotypically Tolerant *Mycobacterium tuberculosis*.  
560 *Microbiology spectrum* 5.
- 561 Hicks, N.D., Yang, J., Zhang, X., Zhao, B., Grad, Y.H., Liu, L., Ou, X., Chang, Z., Xia, H., Zhou, Y., *et al.*  
562 (2018). Clinically prevalent mutations in *Mycobacterium tuberculosis* alter propionate metabolism  
563 and mediate multidrug tolerance. *Nat Microbiol* 3, 1032-1042.
- 564 Hon, W.C., McKay, G.A., Thompson, P.R., Sweet, R.M., Yang, D.S., Wright, G.D., and Berghuis, A.M.  
565 (1997). Structure of an enzyme required for aminoglycoside antibiotic resistance reveals homology to  
566 eukaryotic protein kinases. *Cell* 89, 887-895.
- 567 Hou, Y.M., and Schimmel, P. (1988). A simple structural feature is a major determinant of the identity  
568 of a transfer RNA. *Nature* 333, 140-145.
- 569 Javid, B., Sorrentino, F., Toosky, M., Zheng, W., Pinkham, J.T., Jain, N., Pan, M., Deighan, P., and Rubin,  
570 E.J. (2014). *Mycobacterial* mistranslation is necessary and sufficient for rifampicin phenotypic  
571 resistance. *Proc Natl Acad Sci U S A* 111, 1132-1137.
- 572 Kadokura, H., and Beckwith, J. (2002). Four cysteines of the membrane protein DsbB act in concert to  
573 oxidize its substrate DsbA. *EMBO J* 21, 2354-2363.
- 574 Kohanski, M.A., Dwyer, D.J., Wierzbowski, J., Cottarel, G., and Collins, J.J. (2008). Mistranslation of  
575 membrane proteins and two-component system activation trigger antibiotic-mediated cell death. *Cell*  
576 135, 679-690.
- 577 Kramer, E.B., and Farabaugh, P.J. (2007). The frequency of translational misreading errors in *E. coli* is  
578 largely determined by tRNA competition. *RNA* 13, 87-96.
- 579 Kurylo, C.M., Parks, M.M., Juetter, M.F., Zinshteyn, B., Altman, R.B., Thibado, J.K., Vincent, C.T., and  
580 Blanchard, S.C. (2018). Endogenous rRNA Sequence Variation Can Regulate Stress Response Gene  
581 Expression and Phenotype. *Cell reports* 25, 236-248 e236.
- 582 LaRiviere, F.J., Wolfson, A.D., and Uhlenbeck, O.C. (2001). Uniform binding of aminoacyl-tRNAs to  
583 elongation factor Tu by thermodynamic compensation. *Science* 294, 165-168.
- 584 Lee, J.W., Beebe, K., Nangle, L.A., Jang, J., Longo-Guess, C.M., Cook, S.A., Davisson, M.T., Sundberg,  
585 J.P., Schimmel, P., and Ackerman, S.L. (2006). Editing-defective tRNA synthetase causes protein  
586 misfolding and neurodegeneration. *Nature* 443, 50-55.
- 587 Lee, J.Y., Kim, D.G., Kim, B.G., Yang, W.S., Hong, J., Kang, T., Oh, Y.S., Kim, K.R., Han, B.W., Hwang, B.J.,  
588 *et al.* (2014). Promiscuous methionyl-tRNA synthetase mediates adaptive mistranslation to protect  
589 cells against oxidative stress. *J Cell Sci* 127, 4234-4245.
- 590 Leng, T., Pan, M., Xu, X., and Javid, B. (2015). Translational misreading in *Mycobacterium smegmatis*  
591 increases in stationary phase. *Tuberculosis* 95, 678-681.
- 592 Li, L., Boniecki, M.T., Jaffe, J.D., Imai, B.S., Yau, P.M., Luthey-Schulten, Z.A., and Martinis, S.A. (2011).  
593 Naturally occurring aminoacyl-tRNA synthetases editing-domain mutations that cause mistranslation  
594 in *Mycoplasma* parasites. *Proc Natl Acad Sci U S A* 108, 9378-9383.
- 595 Ling, J., Cho, C., Guo, L.T., Aerni, H.R., Rinehart, J., and Soll, D. (2012). Protein aggregation caused by  
596 aminoglycoside action is prevented by a hydrogen peroxide scavenger. *Mol Cell* 48, 713-722.
- 597 Ling, J., O'Donoghue, P., and Soll, D. (2015). Genetic code flexibility in microorganisms: novel  
598 mechanisms and impact on physiology. *Nat Rev Microbiol* 13, 707-721.
- 599 Liu, Y., Satz, J.S., Vo, M.N., Nangle, L.A., Schimmel, P., and Ackerman, S.L. (2014). Deficiencies in tRNA  
600 synthetase editing activity cause cardioproteinopathy. *Proc Natl Acad Sci U S A* 111, 17570-17575.



- 601 Manickam, N., Nag, N., Abbasi, A., Patel, K., and Farabaugh, P.J. (2014). Studies of translational  
602 misreading in vivo show that the ribosome very efficiently discriminates against most potential errors.  
603 *RNA* 20, 9-15.
- 604 Miranda, I., Silva-Dias, A., Rocha, R., Teixeira-Santos, R., Coelho, C., Goncalves, T., Santos, M.A., Pina-  
605 Vaz, C., Solis, N.V., Filler, S.G., *et al.* (2013). *Candida albicans* CUG mistranslation is a mechanism to  
606 create cell surface variation. *MBio* 4.
- 607 Mohler, K., and Ibba, M. (2017). Translational fidelity and mistranslation in the cellular response to  
608 stress. *Nat Microbiol* 2, 17117.
- 609 Morse, J.C., Girodat, D., Burnett, B.J., Holm, M., Altman, R.B., Sanbonmatsu, K.Y., Wieden, H.-J., and  
610 Blanchard, S.C. (2020). Elongation factor-Tu can repetitively engage aminoacyl-tRNA within the  
611 ribosome during the proofreading stage of tRNA selection. *Proceedings of the National Academy of*  
612 *Sciences* 117, 3610-3620.
- 613 Netzer, N., Goodenbour, J.M., David, A., Dittmar, K.A., Jones, R.B., Schneider, J.R., Boone, D., Eves,  
614 E.M., Rosner, M.R., Gibbs, J.S., *et al.* (2009). Innate immune and chemically triggered oxidative stress  
615 modifies translational fidelity. *Nature* 462, 522-526.
- 616 Okamoto, S., Tamaru, A., Nakajima, C., Nishimura, K., Tanaka, Y., Tokuyama, S., Suzuki, Y., and Ochi, K.  
617 (2007). Loss of a conserved 7-methylguanosine modification in 16S rRNA confers low-level  
618 streptomycin resistance in bacteria. *Mol Microbiol* 63, 1096-1106.
- 619 Pape, T., Wintermeyer, W., and Rodnina, M.V. (1998). Complete kinetic mechanism of elongation  
620 factor Tu-dependent binding of aminoacyl-tRNA to the A site of the *E. coli* ribosome. *EMBO J* 17, 7490-  
621 7497.
- 622 Parks, M.M., Kurylo, C.M., Dass, R.A., Bojmar, L., Lyden, D., Vincent, C.T., and Blanchard, S.C. (2018).  
623 Variant ribosomal RNA alleles are conserved and exhibit tissue-specific expression. *Sci Adv* 4,  
624 eaao0665.
- 625 Rathnayake, U.M., Wood, W.N., and Hendrickson, T.L. (2017). Indirect tRNA aminoacylation during  
626 accurate translation and phenotypic mistranslation. *Curr Opin Chem Biol* 41, 114-122.
- 627 Reynolds, N.M., Ling, J., Roy, H., Banerjee, R., Repasky, S.E., Hamel, P., and Ibba, M. (2010). Cell-specific  
628 differences in the requirements for translation quality control. *Proc Natl Acad Sci U S A* 107, 4063-  
629 4068.
- 630 Ribas de Pouplana, L., Santos, M.A., Zhu, J.H., Farabaugh, P.J., and Javid, B. (2014). Protein  
631 mistranslation: friend or foe? *Trends in biochemical sciences* 39, 355-362.
- 632 Richardson, K., Bennion, O.T., Tan, S., Hoang, A.N., Cokol, M., and Aldridge, B.B. (2016). Temporal and  
633 intrinsic factors of rifampicin tolerance in mycobacteria. *Proc Natl Acad Sci U S A* 113, 8302-8307.
- 634 Ruan, B., Palioura, S., Sabina, J., Marvin-Guy, L., Kochhar, S., Larossa, R.A., and Soll, D. (2008). Quality  
635 control despite mistranslation caused by an ambiguous genetic code. *Proc Natl Acad Sci U S A* 105,  
636 16502-16507.
- 637 Rubio Gomez, M.A., and Ibba, M. (2020). Aminoacyl-tRNA synthetases. *RNA* 26, 910-936.
- 638 Safi, H., Gopal, P., Lingaraju, S., Ma, S., Levine, C., Dartois, V., Yee, M., Li, L., Blanc, L., Ho Liang, H.P.,  
639 *et al.* (2019). Phase variation in *Mycobacterium tuberculosis* glpK produces transiently heritable drug  
640 tolerance. *Proc Natl Acad Sci U S A* 116, 19665-19674.
- 641 Schuwirth, B.S., Day, J.M., Hau, C.W., Janssen, G.R., Dahlberg, A.E., Cate, J.H., and Vila-Sanjurjo, A.  
642 (2006). Structural analysis of kasugamycin inhibition of translation. *Nat Struct Mol Biol* 13, 879-886.
- 643 Schwartz, M.H., and Pan, T. (2016). Temperature dependent mistranslation in a hyperthermophile  
644 adapts proteins to lower temperatures. *Nucleic Acids Res* 44, 294-303.
- 645 Schwartz, M.H., and Pan, T. (2017). Function and origin of mistranslation in distinct cellular contexts.  
646 *Crit Rev Biochem Mol Biol* 52, 205-219.
- 647 Schwartz, M.H., Waldbauer, J.R., Zhang, L., and Pan, T. (2016). Global tRNA misacylation induced by  
648 anaerobiosis and antibiotic exposure broadly increases stress resistance in *Escherichia coli*. *Nucleic*  
649 *Acids Res*.
- 650 Sheppard, K., and Soll, D. (2008). On the evolution of the tRNA-dependent amidotransferases, GatCAB  
651 and GatDE. *J Mol Biol* 377, 831-844.



652 Shippy, D.C., and Fadl, A.A. (2015). RNA modification enzymes encoded by the gid operon: Implications  
653 in biology and virulence of bacteria. *Microb Pathog* 89, 100-107.

654 Sloan, K.E., Warda, A.S., Sharma, S., Entian, K.-D., Lafontaine, D.L.J., and Bohnsack, M.T. (2017). Tuning  
655 the ribosome: The influence of rRNA modification on eukaryotic ribosome biogenesis and function.  
656 *RNA Biology* 14, 1138-1152.

657 Snapper, S.B., Melton, R.E., Mustafa, S., Kieser, T., and Jacobs, W.R., Jr. (1990). Isolation and  
658 characterization of efficient plasmid transformation mutants of *Mycobacterium smegmatis*. *Mol*  
659 *Microbiol* 4, 1911-1919.

660 Su, H.W., Zhu, J.H., Li, H., Cai, R.J., Ealand, C., Wang, X., Chen, Y.X., Kayani, M.U., Zhu, T.F.,  
661 Moradigaravand, D., *et al.* (2016). The essential mycobacterial amidotransferase GatCAB is a  
662 modulator of specific translational fidelity. *Nat Microbiol* 1, 16147.

663 Swairjo, M.A., Otero, F.J., Yang, X.L., Lovato, M.A., Skene, R.J., McRee, D.E., Ribas de Pouplana, L., and  
664 Schimmel, P. (2004). Alanyl-tRNA synthetase crystal structure and design for acceptor-stem  
665 recognition. *Mol Cell* 13, 829-841.

666 Tollerson, R., 2nd, and Ibba, M. (2020). Translational regulation of environmental adaptation in  
667 bacteria. *J Biol Chem* 295, 10434-10445.

668 van Buul, C.P., Visser, W., and van Knippenberg, P.H. (1984). Increased translational fidelity caused by  
669 the antibiotic kasugamycin and ribosomal ambiguity in mutants harbouring the ksgA gene. *FEBS Lett*  
670 177, 119-124.

671 Vargas-Rodriguez, O., and Musier-Forsyth, K. (2013). Exclusive use of trans-editing domains prevents  
672 proline mistranslation. *J Biol Chem* 288, 14391-14399.

673 Vijay, S., Nhung, H.N., Bao, N.L.H., Thu, D.D.A., Trieu, L.P.T., Phu, N.H., Thwaites, G.E., Javid, B., and  
674 Thuong, N.T.T. (2020). Most-probable number based minimum duration of killing assay for  
675 determining the spectrum of rifampicin susceptibility in clinical *M. tuberculosis* isolates. *Antimicrob*  
676 *Agents Chemother.*

677 Vilcheze, C., Hartman, T., Weinrick, B., Jain, P., Weisbrod, T.R., Leung, L.W., Freundlich, J.S., and Jacobs,  
678 W.R., Jr. (2017). Enhanced respiration prevents drug tolerance and drug resistance in *Mycobacterium*  
679 *tuberculosis*. *Proc Natl Acad Sci U S A* 114, 4495-4500.

680 Wakamoto, Y., Dhar, N., Chait, R., Schneider, K., Signorino-Gelo, F., Leibler, S., and McKinney, J.D.  
681 (2013). Dynamic persistence of antibiotic-stressed mycobacteria. *Science* 339, 91-95.

682 Wang, B.W., Zhu, J.H., and Javid, B. (2020). Clinically relevant mutations in mycobacterial LepA cause  
683 rifampicin-specific phenotypic resistance. *Sci Rep* 10, 8402.

684 Wong, S.Y., Javid, B., Addepalli, B., Piszczek, G., Strader, M.B., Limbach, P.A., and Barry, C.E., 3rd  
685 (2013). Functional role of methylation of G518 of the 16S rRNA 530 loop by *GidB* in *Mycobacterium*  
686 *tuberculosis*. *Antimicrob Agents Chemother* 57, 6311-6318.

687 Yao, Y., Zhang, W., Zhang, M., Jin, S., Guo, Y., Zu, Y., Ren, K., Wang, K., Chen, G., Lou, C., *et al.* (2019).  
688 A Direct RNA-to-RNA Replication System for Enhanced Gene Expression in Bacteria. *ACS Synth Biol* 8,  
689 1067-1078.

690 Zaher, H.S., and Green, R. (2009a). Fidelity at the molecular level: lessons from protein synthesis. *Cell*  
691 136, 746-762.

692 Zaher, H.S., and Green, R. (2009b). Quality control by the ribosome following peptide bond formation.  
693 *Nature* 457, 161-166.

694 Zhang, Y.W., Zhu, J.H., Wang, Z.Q., Wu, Y., Meng, X., Zheng, X., and Javid, B. (2019). HspX promotes  
695 the polar localization of mycobacterial protein aggregates. *Sci Rep* 9, 14571.

696 Zhu, J.H., Wang, B.W., Pan, M., Zeng, Y.N., Rego, H., and Javid, B. (2018). Rifampicin can induce  
697 antibiotic tolerance in mycobacteria via paradoxical changes in rpoB transcription. *Nature*  
698 *communications* 9, 4218.

699

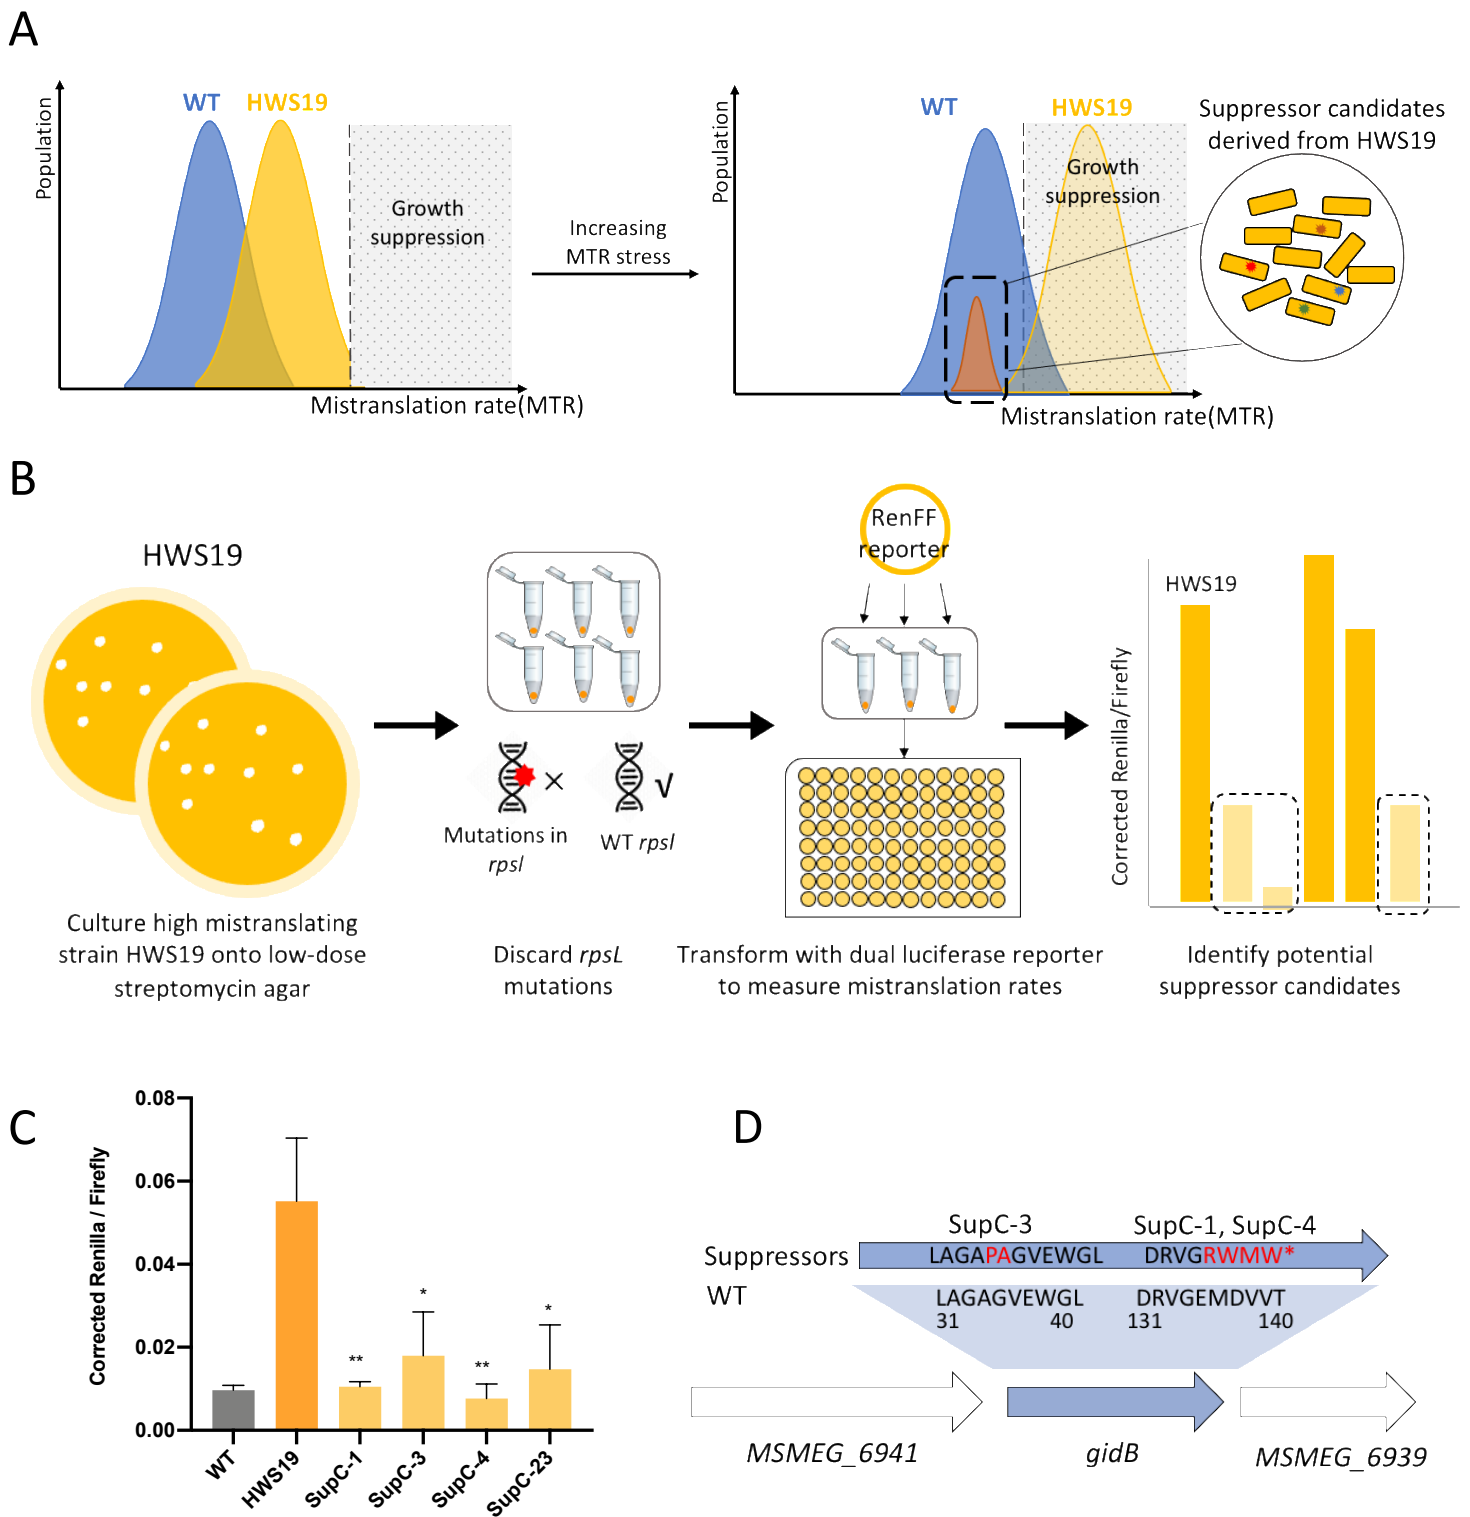

**Figure 1. A suppressor screen identifies *gidB* as a potential translational fidelity factor. (A)** Schematic of principle for the suppressor screen: Excess mistranslation results in growth suppression. Culture of high mistranslating strain HWS19 under conditions that increases mistranslation rates selects for mutations that increase translational fidelity to levels similar to wild-type bacteria. **(B)** Cartoon outline of the screen: Strain HWS19 was cultured on low-dose streptomycin agar to select low mistranslating mutants. Streptomycin-resistant mutants were discarded before transforming survivors with dual luciferase mistranslation reporter to identify potential suppressors. **(C)** Corrected Renilla/firefly (measuring asparagine to aspartate mistranslation) of wild-type, HWS19 and suppressor mistranslation rates. **(D)** Cartoon mapping location of mutations in *gidB* from 3 suppressor candidates.

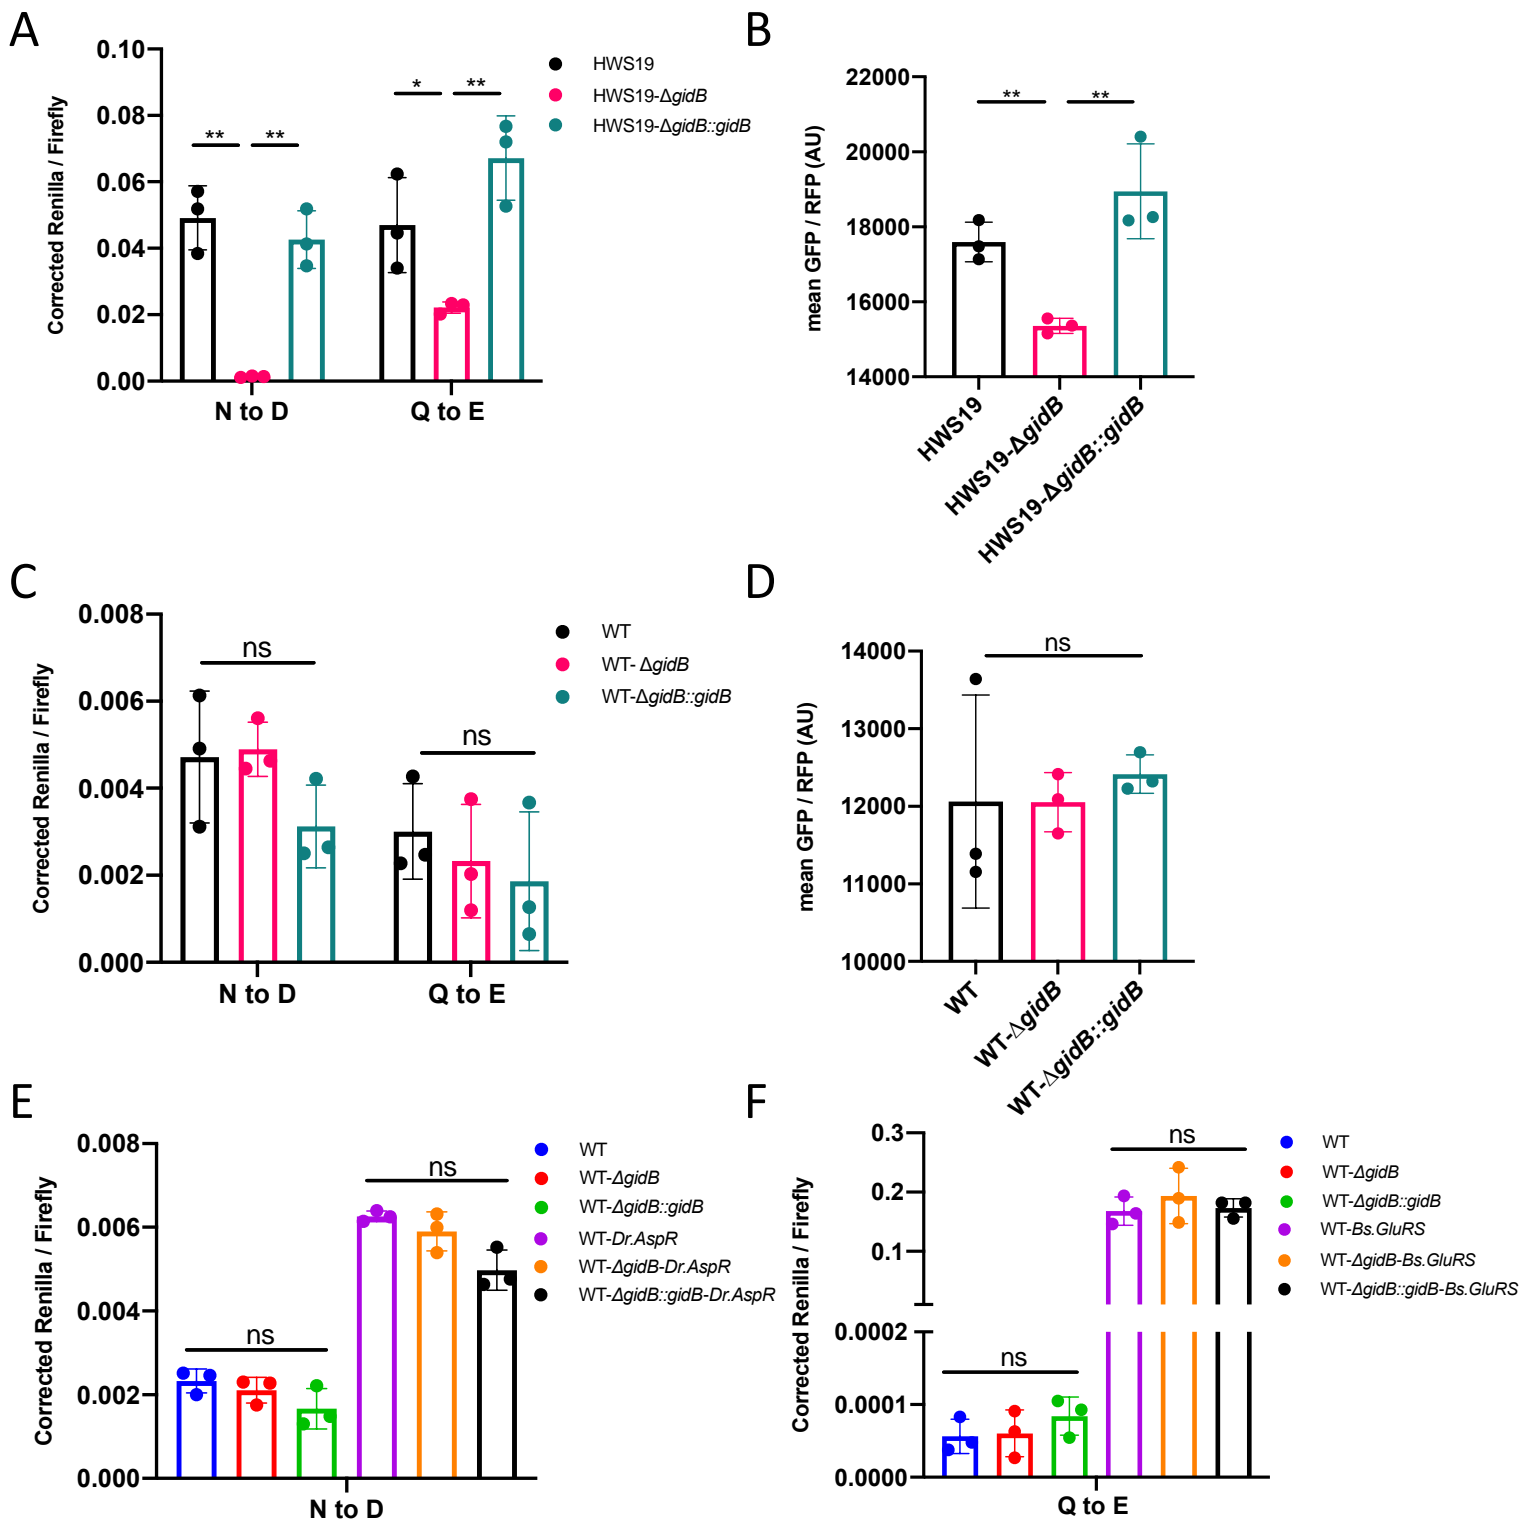

**Figure 2. Deletion of *gidB* increases discrimination against misacylated tRNA in mycobacteria with high mistranslation.** (A) Measurement of asparagine to aspartate and glutamine to glutamate mistranslation rates using dual-luciferase reporters in strains HWS19, HWS19 $\Delta$ *gidB* and HWS19 $\Delta$ *gidB*::*gidB*. (B) measurement of glutamine to glutamate mistranslation rates using a dual-fluorescent reporter in strains HWS19, HWS19 $\Delta$ *gidB* and HWS19 $\Delta$ *gidB*::*gidB*. (C) and (D) Same as (A) and (B) respectively but with strains WT, WT $\Delta$ *gidB* and WT $\Delta$ *gidB*::*gidB* *M. smegmatis*. Measurement of asparagine to aspartate (E) and glutamine to glutamate (F) mistranslation rates using dual-luciferase reporters in WT,  $\Delta$ *gidB*, complemented ( $\Delta$ *gidB*::*gidB*) *E. coli*, and upon induction of non-discriminatory aspartyl (WT-*Dr.AspR*) and non-discriminatory glutamyl (WT-*Bs.GluRS*) aminoacyl synthetases, with *gidB* deletion and complementation. In all cases, 3 biological replicates per condition. \* $p < 0.05$ , \*\* $p < 0.01$ , \*\*\* $p < 0.001$ , ns  $p > 0.05$  by Student's t-test.

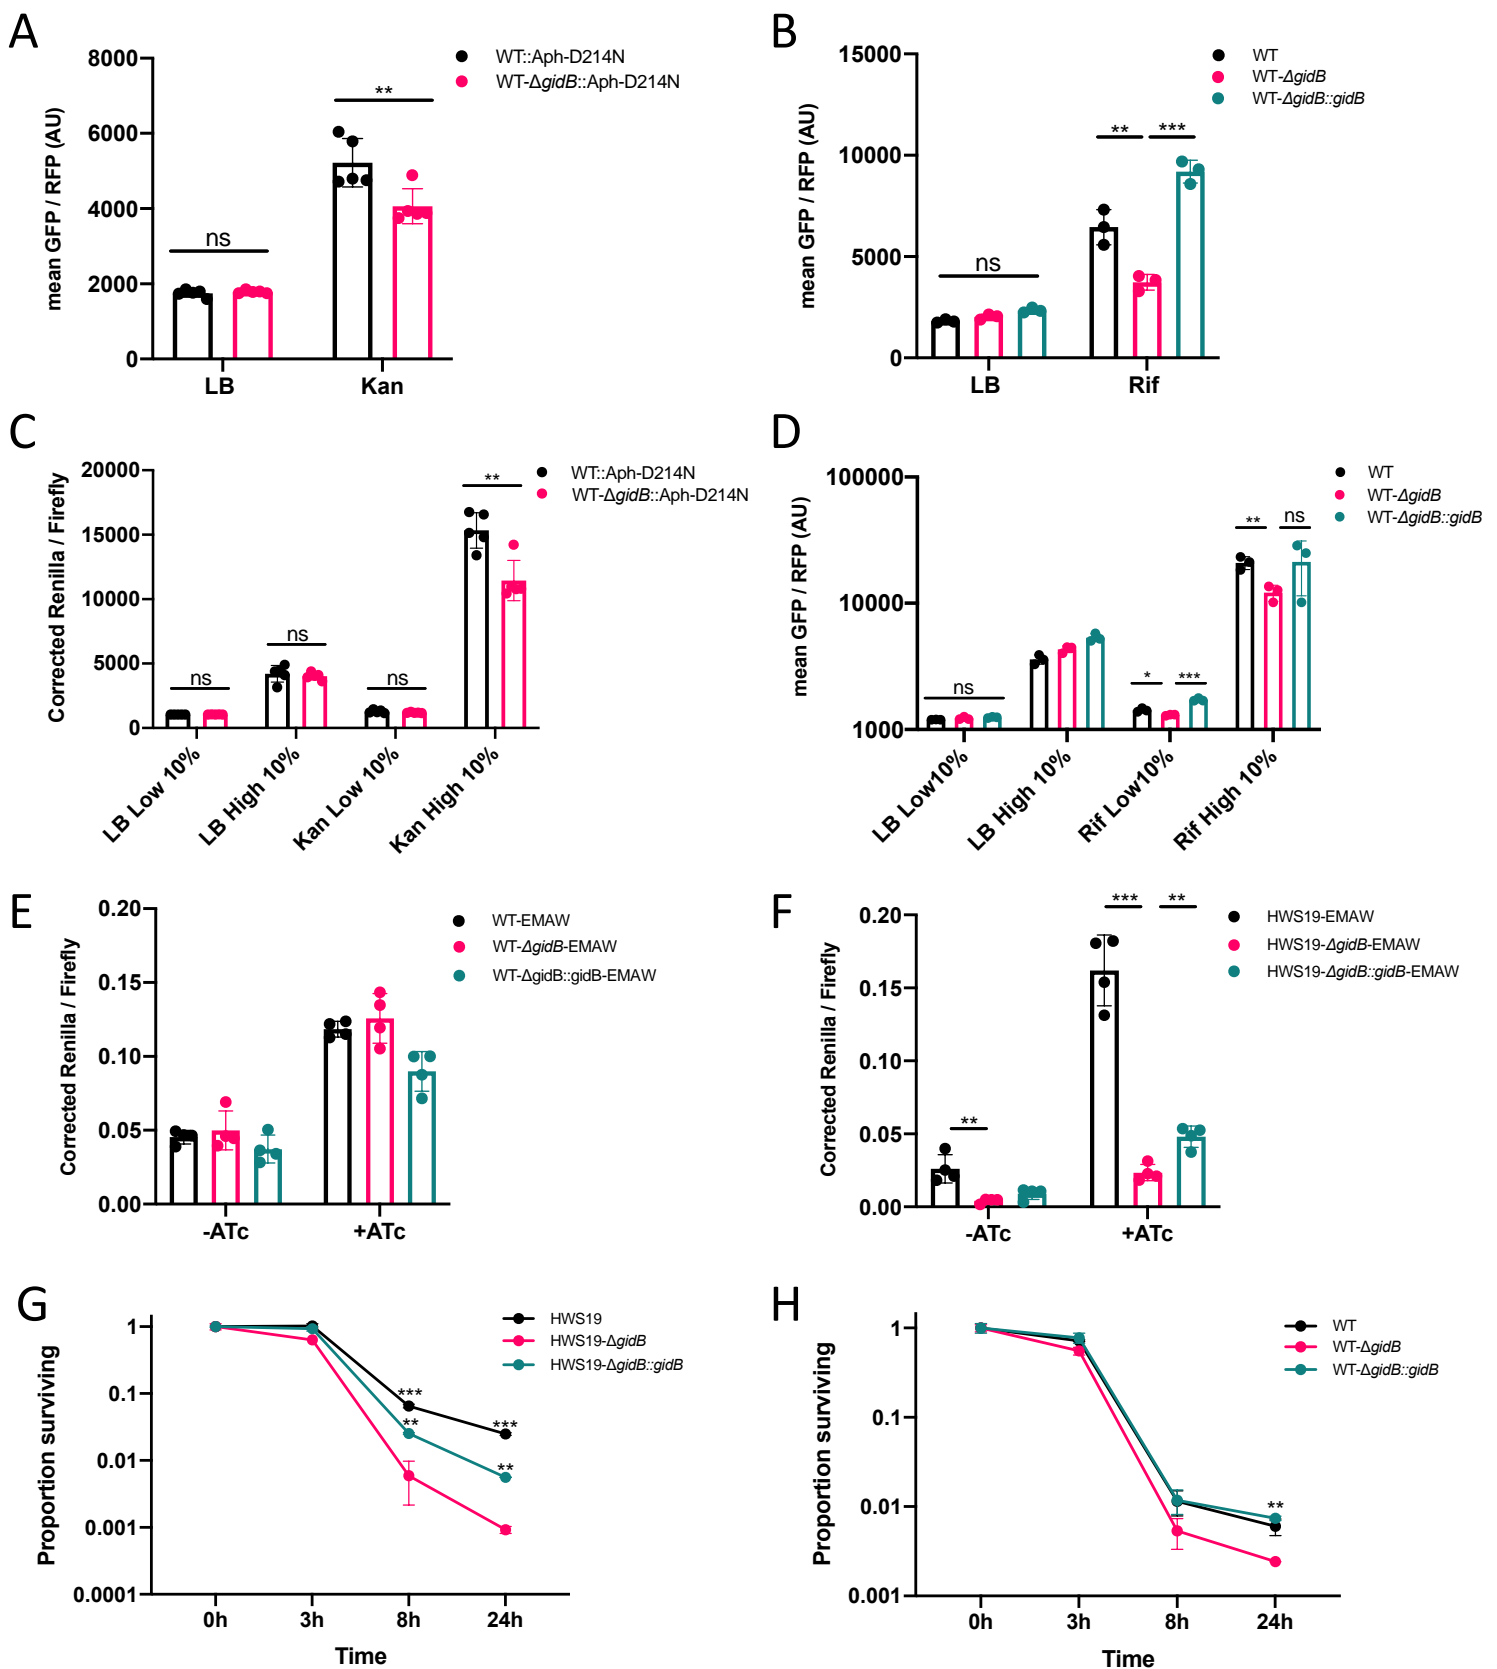

**Figure 3. GidB is necessary for discrimination of mischarged tRNA under conditions that enrich for relatively high mistranslation rates.** (A) Measurement of glutamine to glutamate mistranslation rates using dual-fluorescent reporter in WT and *gidB*-deleted *M. smegmatis* expressing Aph-D214N reporter isolated from LB-agar (LB) or 2 $\mu$ g/mL kanamycin-agar (Kan). (B) Same as (A) but with WT, *gidB*-deleted and complemented strains isolated from LB-agar (LB) or 20 $\mu$ g/mL rifampicin-agar (Rif). (C) and (D) analysis of data in (A) and (B) respectively, but selectively gating only on the bacterial population with the lowest (low 10%) and highest (high 10%) GFP/RFP ratios representing mistranslation rates. (E) Measurement of tryptophan to alanine mistranslation rates using dual-luciferase reporter of WT, *gidB*-deleted and complemented *M. smegmatis* expressing tRNA<sub>CCA</sub><sup>Ala</sup> (EMAW) in absence (-ATc) and presence (+ATc) of anhydrotetracycline to induce expression of the tRNA. (F) Same as (E) but on HWS19 background. Time-kill to rifampicin (20 $\mu$ g/m) survival graph of *M. smegmatis*, *gidB*-deleted and complemented *M. smegmatis* on WT (G) and HWS19 (H) strain backgrounds. Mean of biological replicates (>3) +/- SD shown in each panel. \**p*<0.05, \*\**p*<0.01, \*\*\**p*<0.001, ns *p*>0.05 by Student's t-test).
